# Supplementary material for: Optimum Application of Hybrid Data Driven Models With Two Step Verification Method at Mangla Watershed, Pakistan
Source: Research Square preprint supplement (doi:10.21203/rs.3.rs-989802/v1), 2021-10-21
Supplement: Supplementary file 1 [file d6597e8da14e6b1ffa9e8cf1.docx]

# Supplementary List of Figures:

Figure 1. Simple Multilayer Perceptron structure with two hidden layers

Figure 2. Support vector regression working flow chart

Figure 3. Decomposition of Original time series (a) streamflow, (b) temperature (c) precipitation by EMD

Figure 4. Decomposition of Original time series (a) streamflow, (b) temperature (c) precipitation by EEMD

Figure 5. Decomposition of Original time series (a) streamflow, (b) temperature (c) precipitation by ICEEMDAN

Figure 6. FHGs for observed vs all developed RMs and RRMs models during calibration phase

Figure 7. EVA and LVA for all ICEEMDAN based models


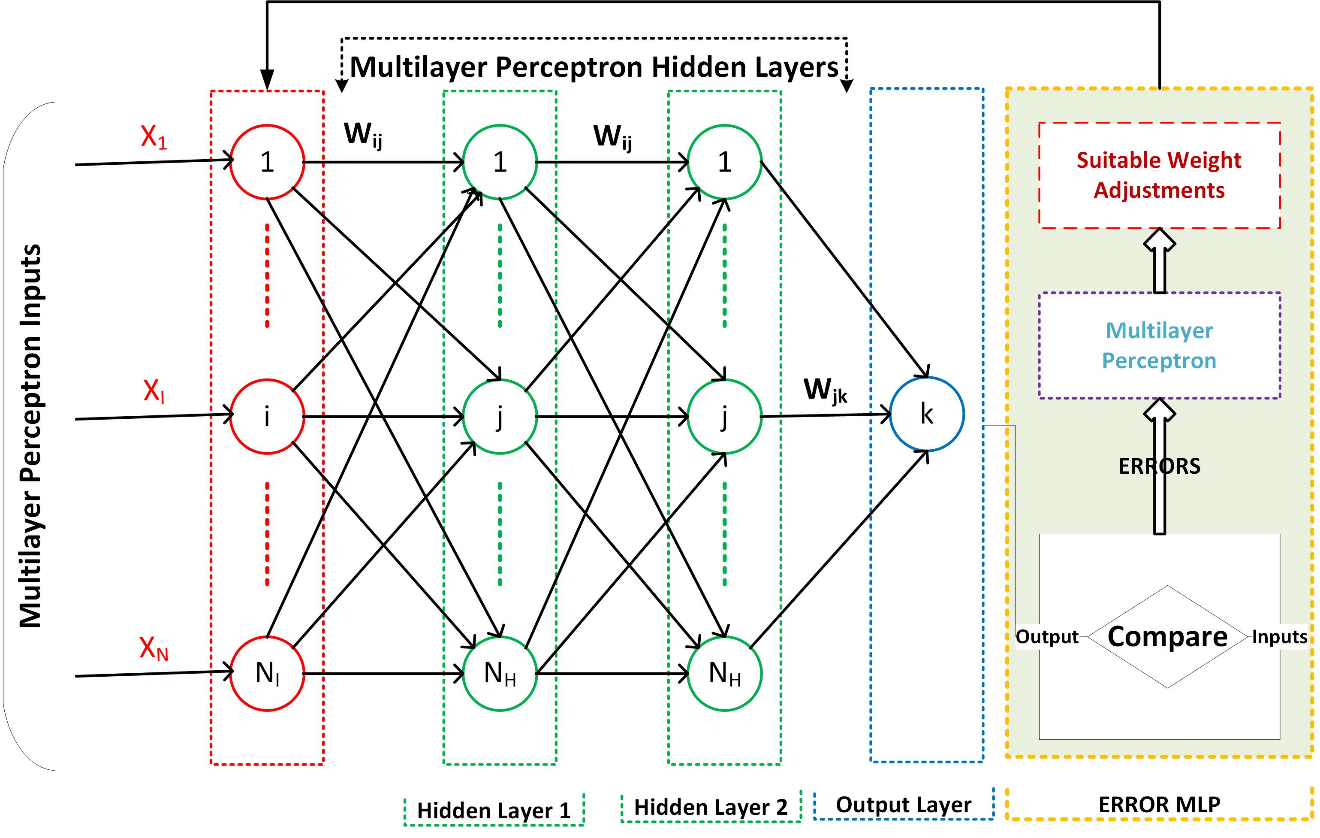


Figure 1. Simple Multilayer Perceptron structure with two hidden layers


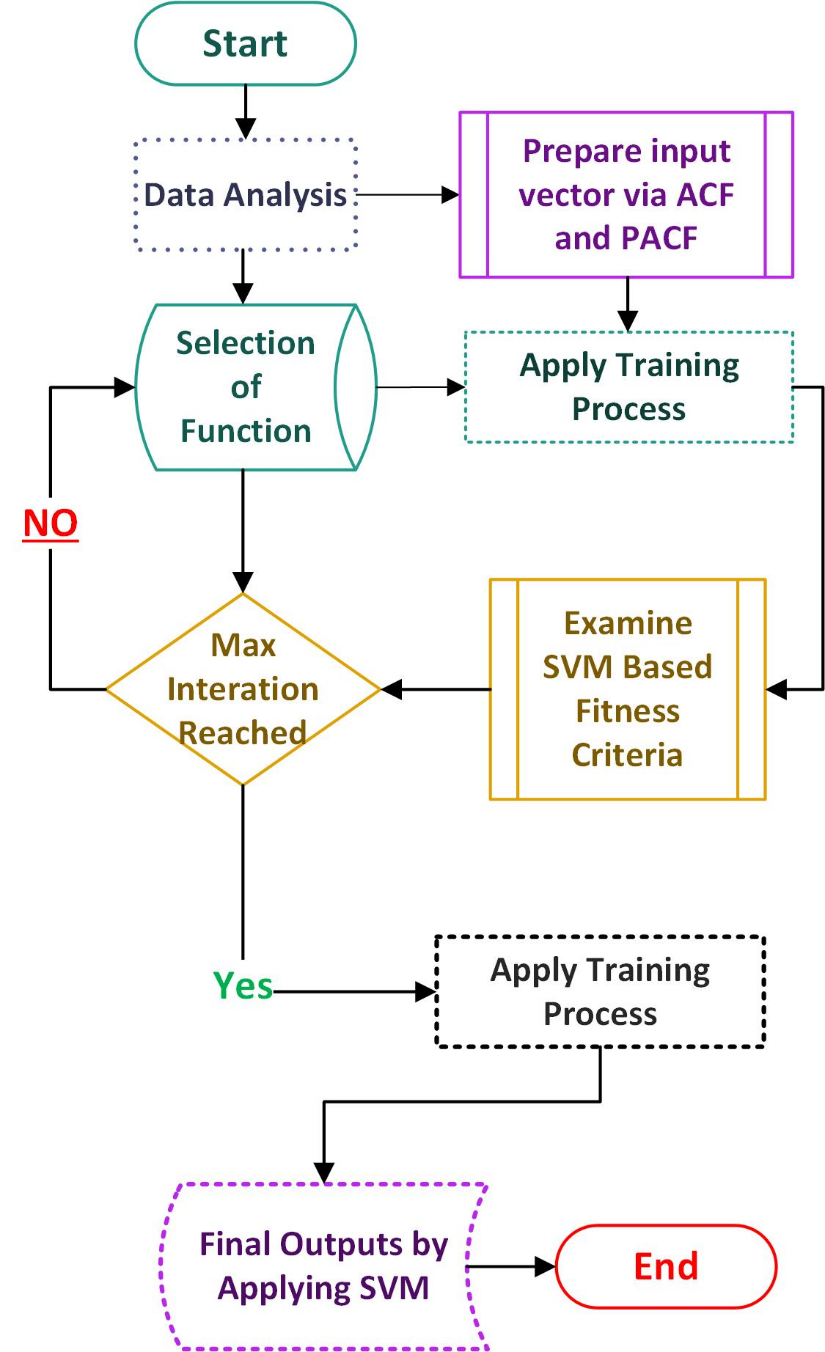


Figure 2. Support vector regression working flow chart


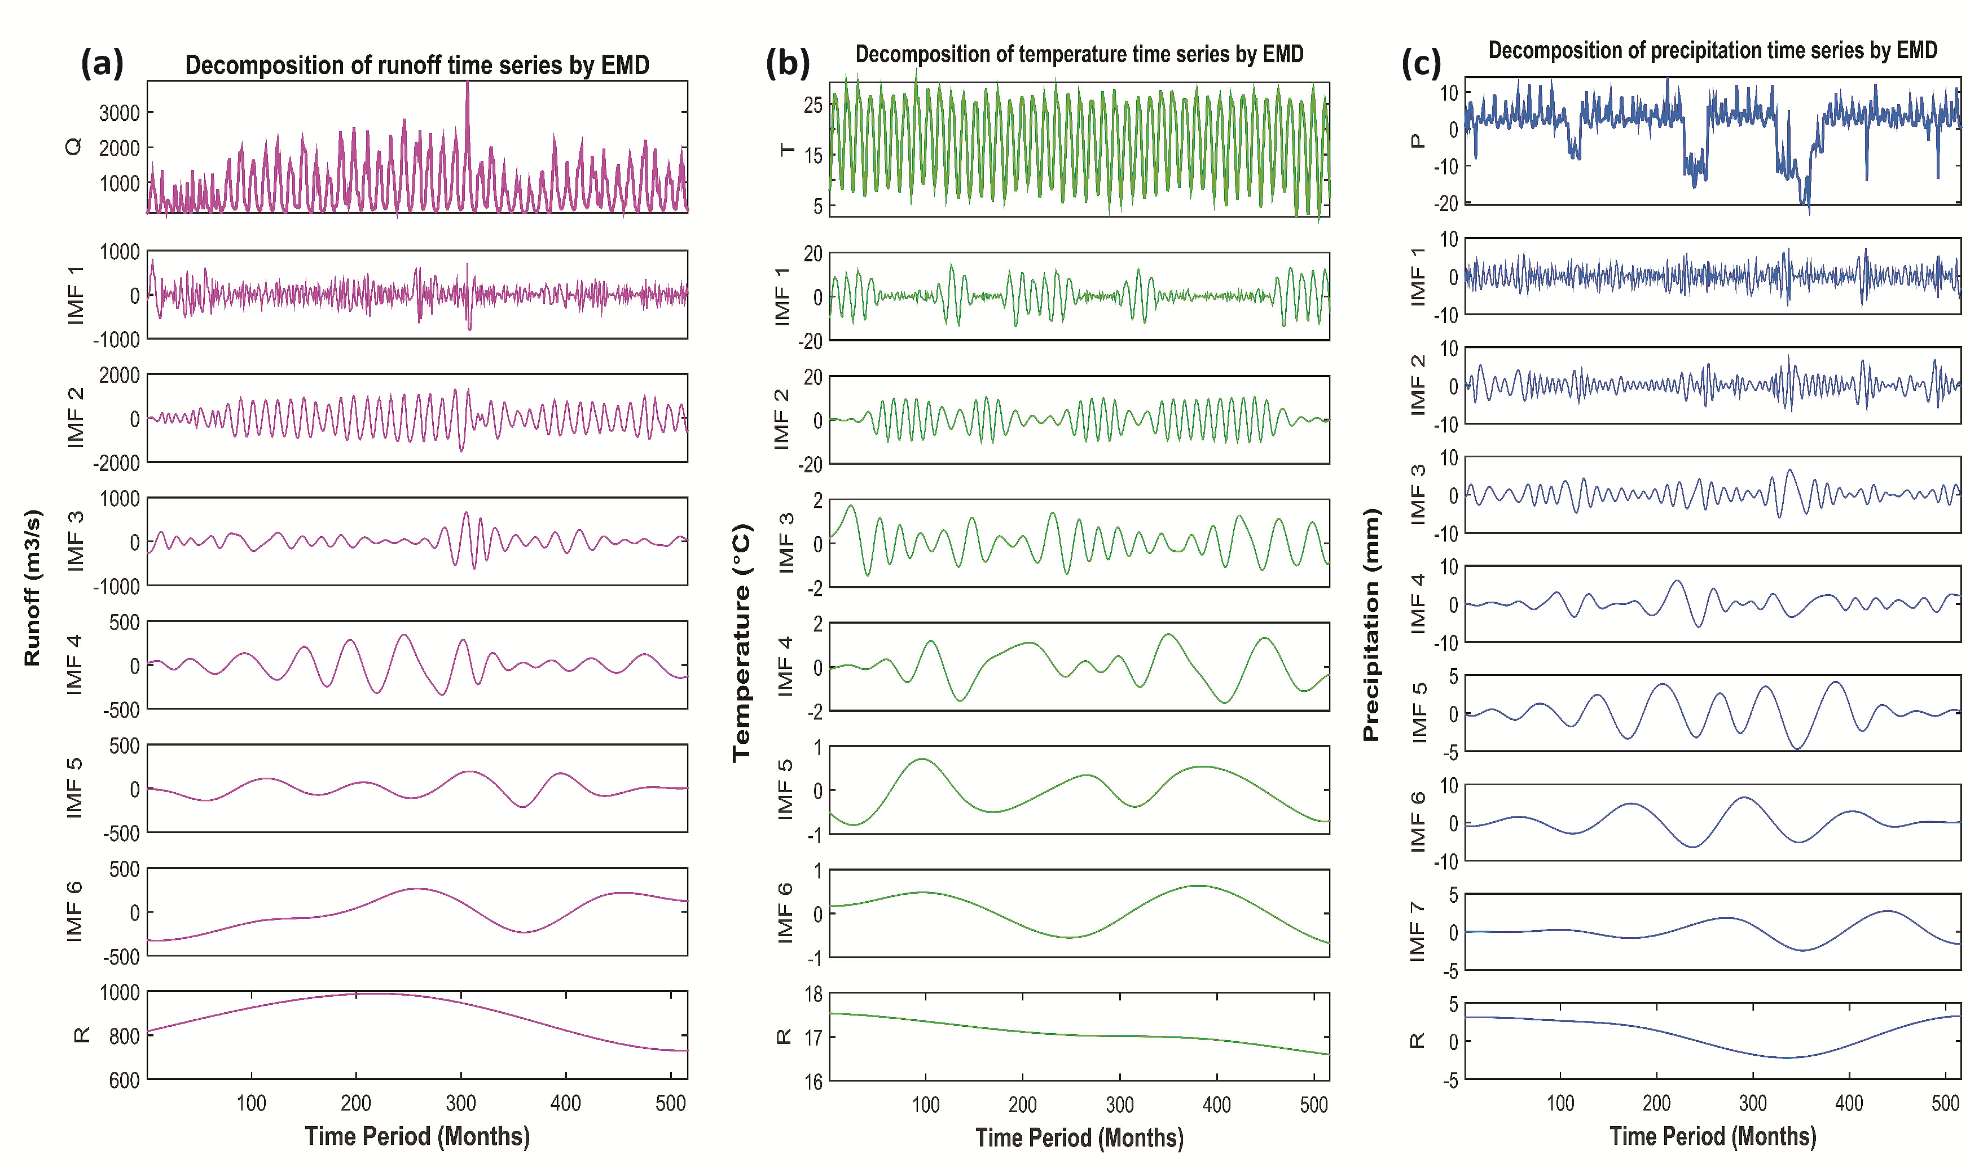


Figure 3. Decomposition of Original time series (a) streamflow, (b) temperature (c) precipitation by EMD


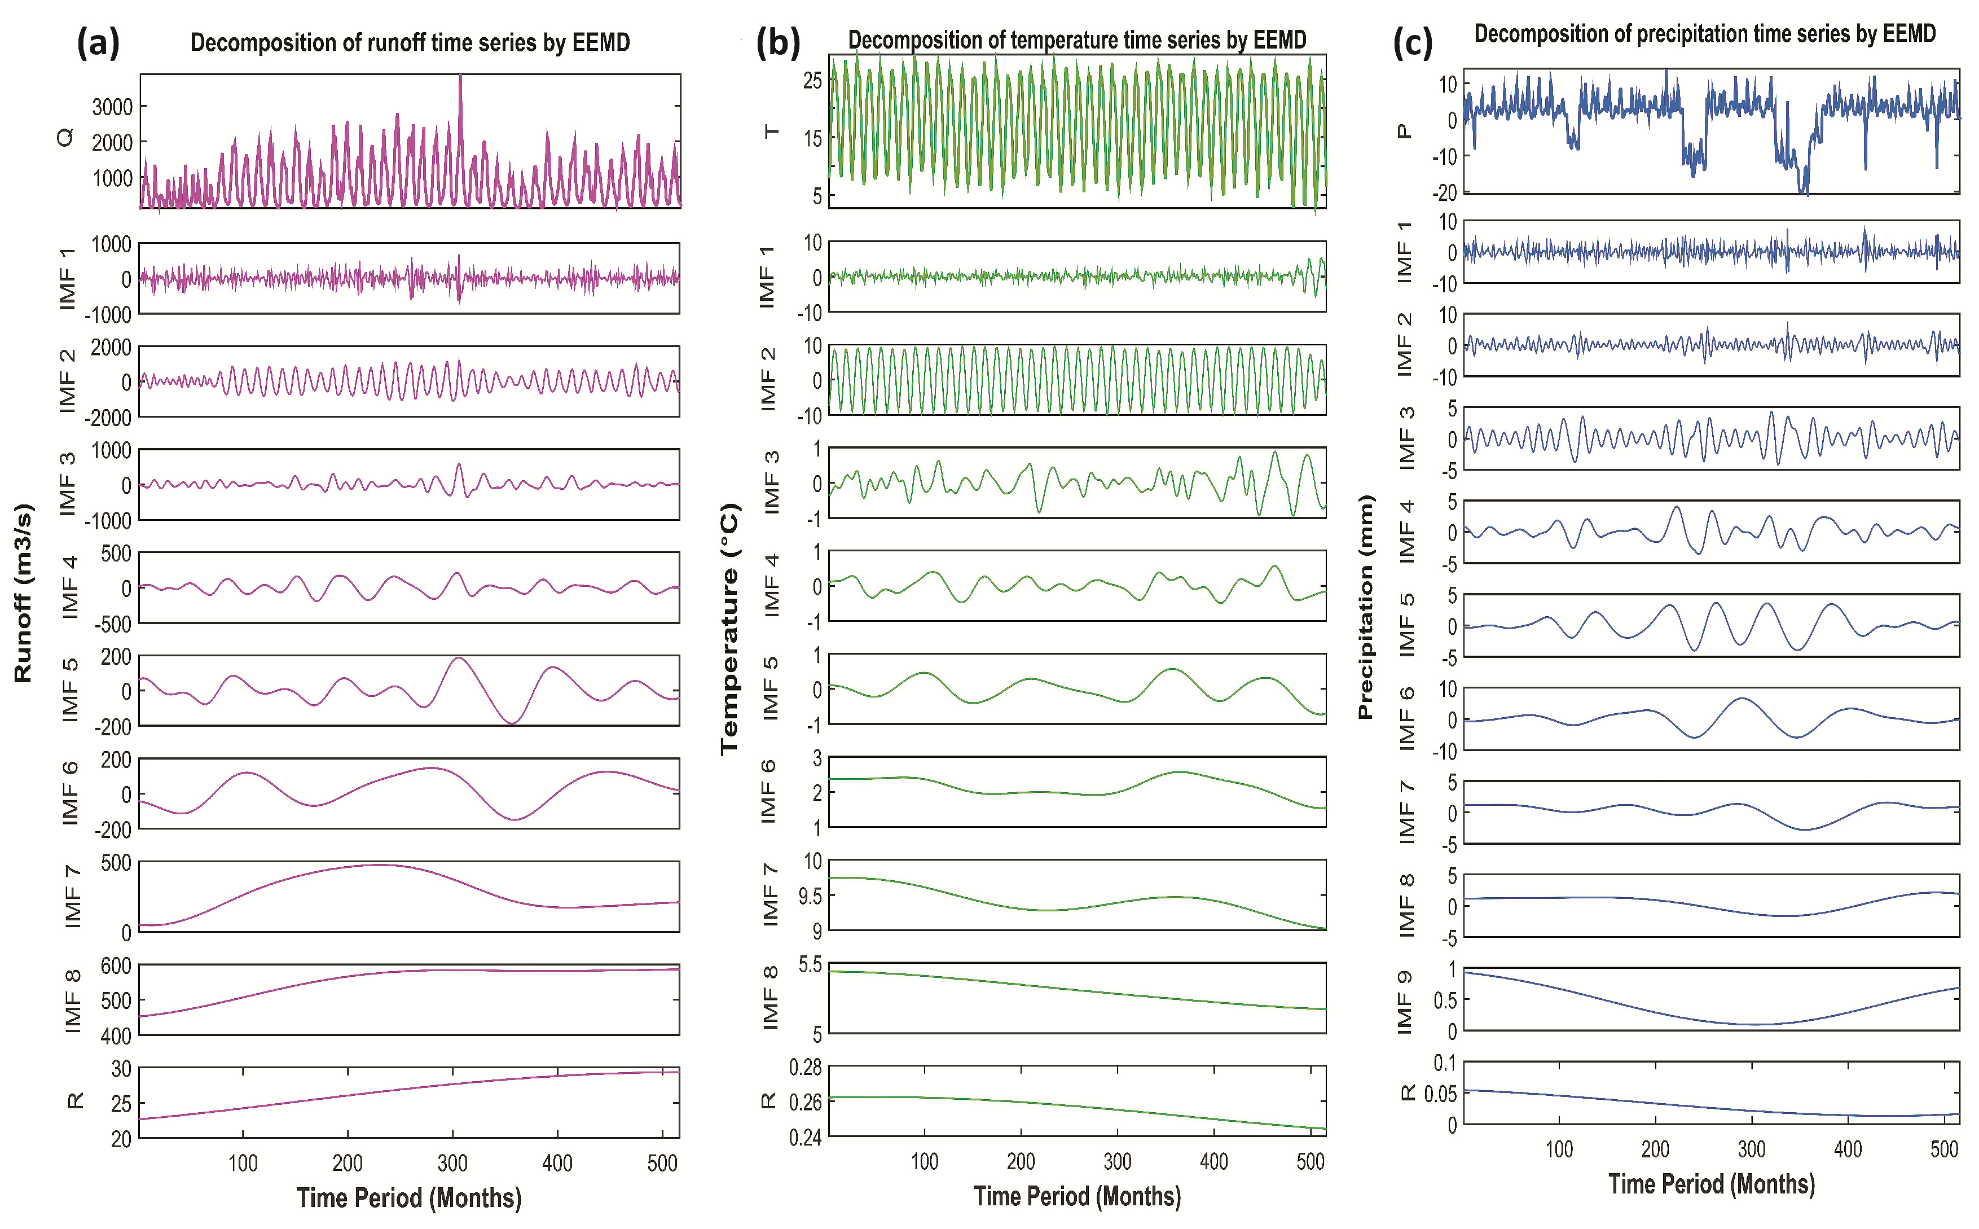


Figure 4. Decomposition of Original time series (a) streamflow, (b) temperature (c) precipitation by EEMD


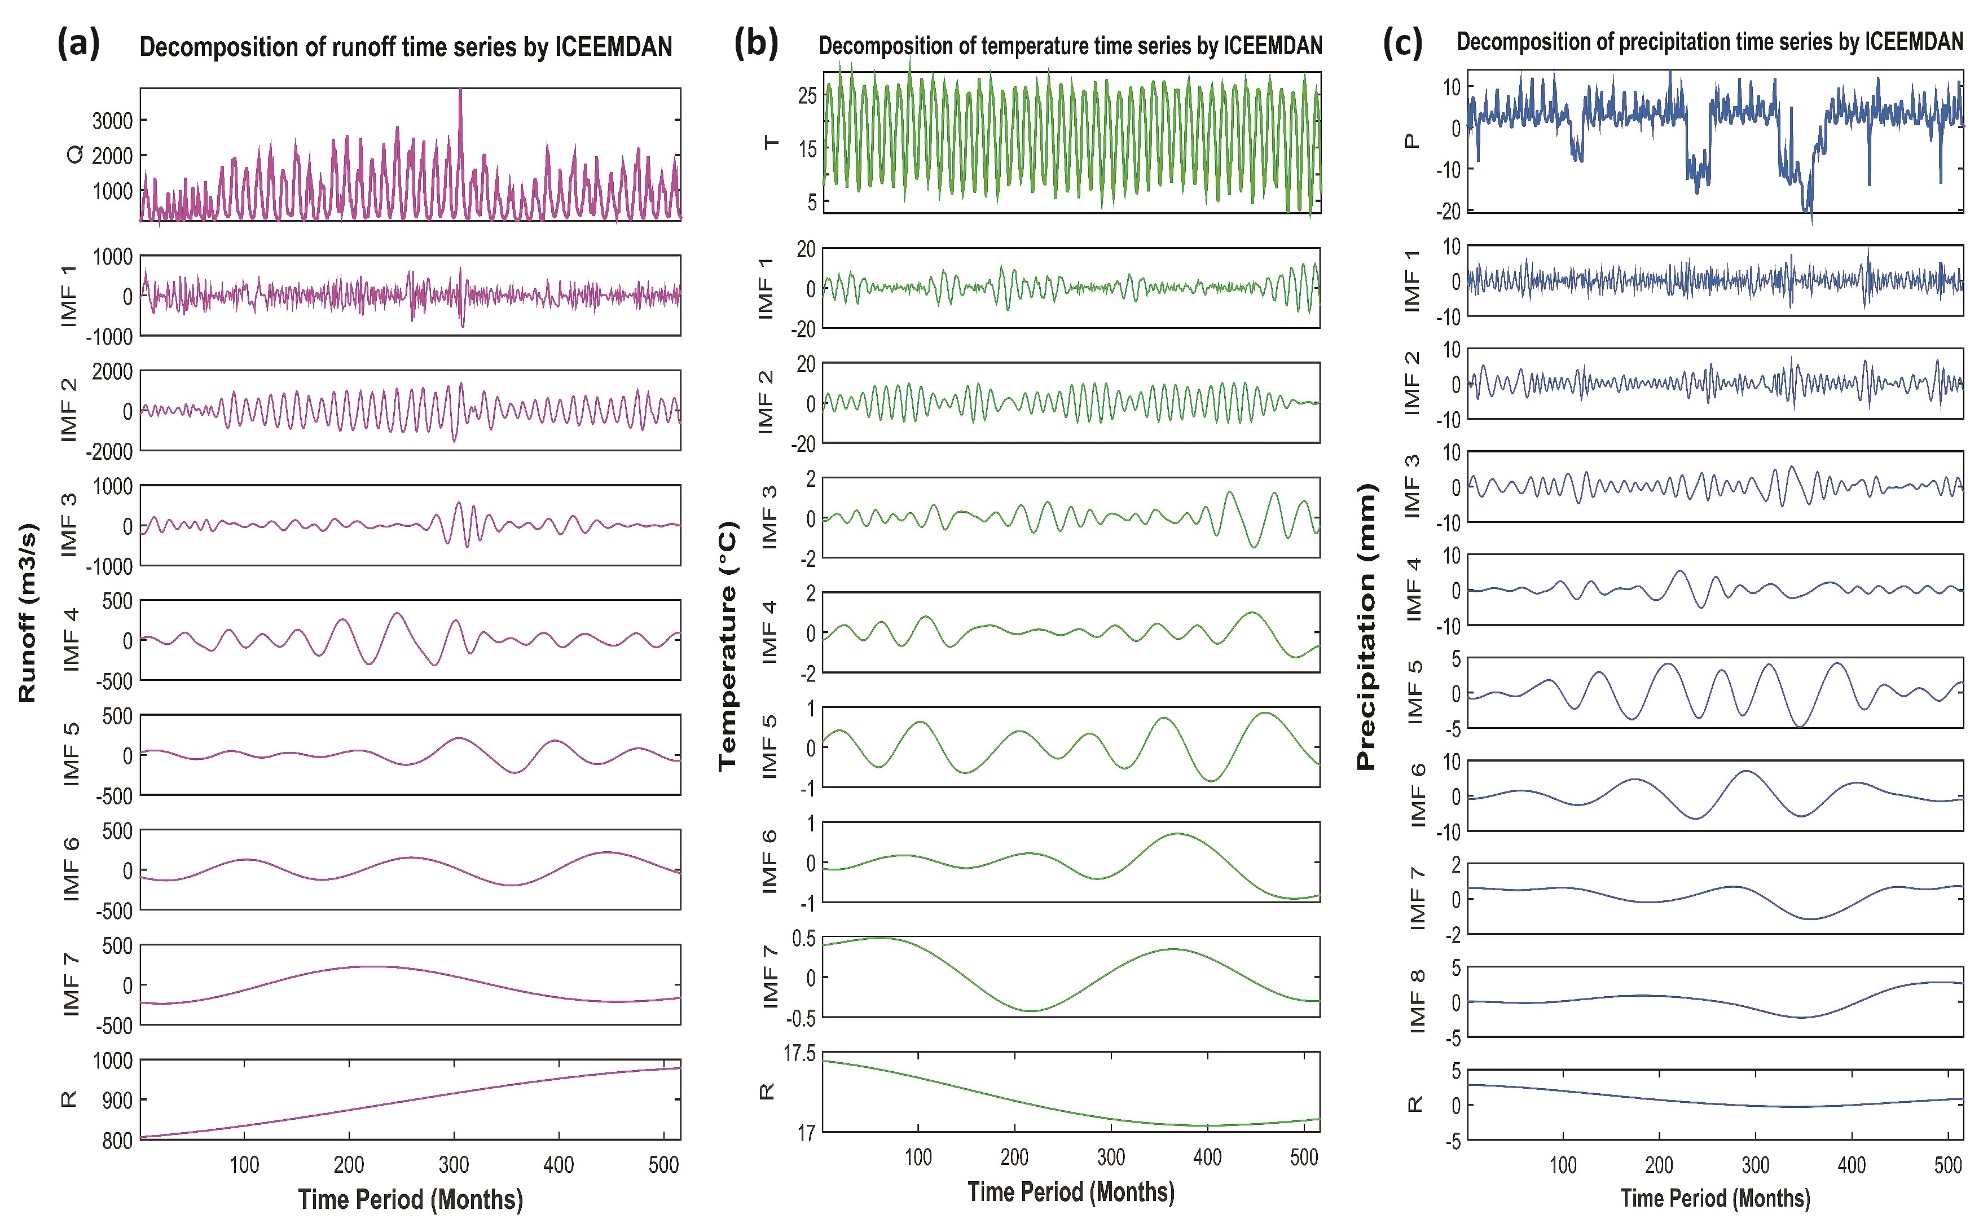


Figure 5. Decomposition of Original time series (a) streamflow, (b) temperature (c) precipitation by ICEEMDAN


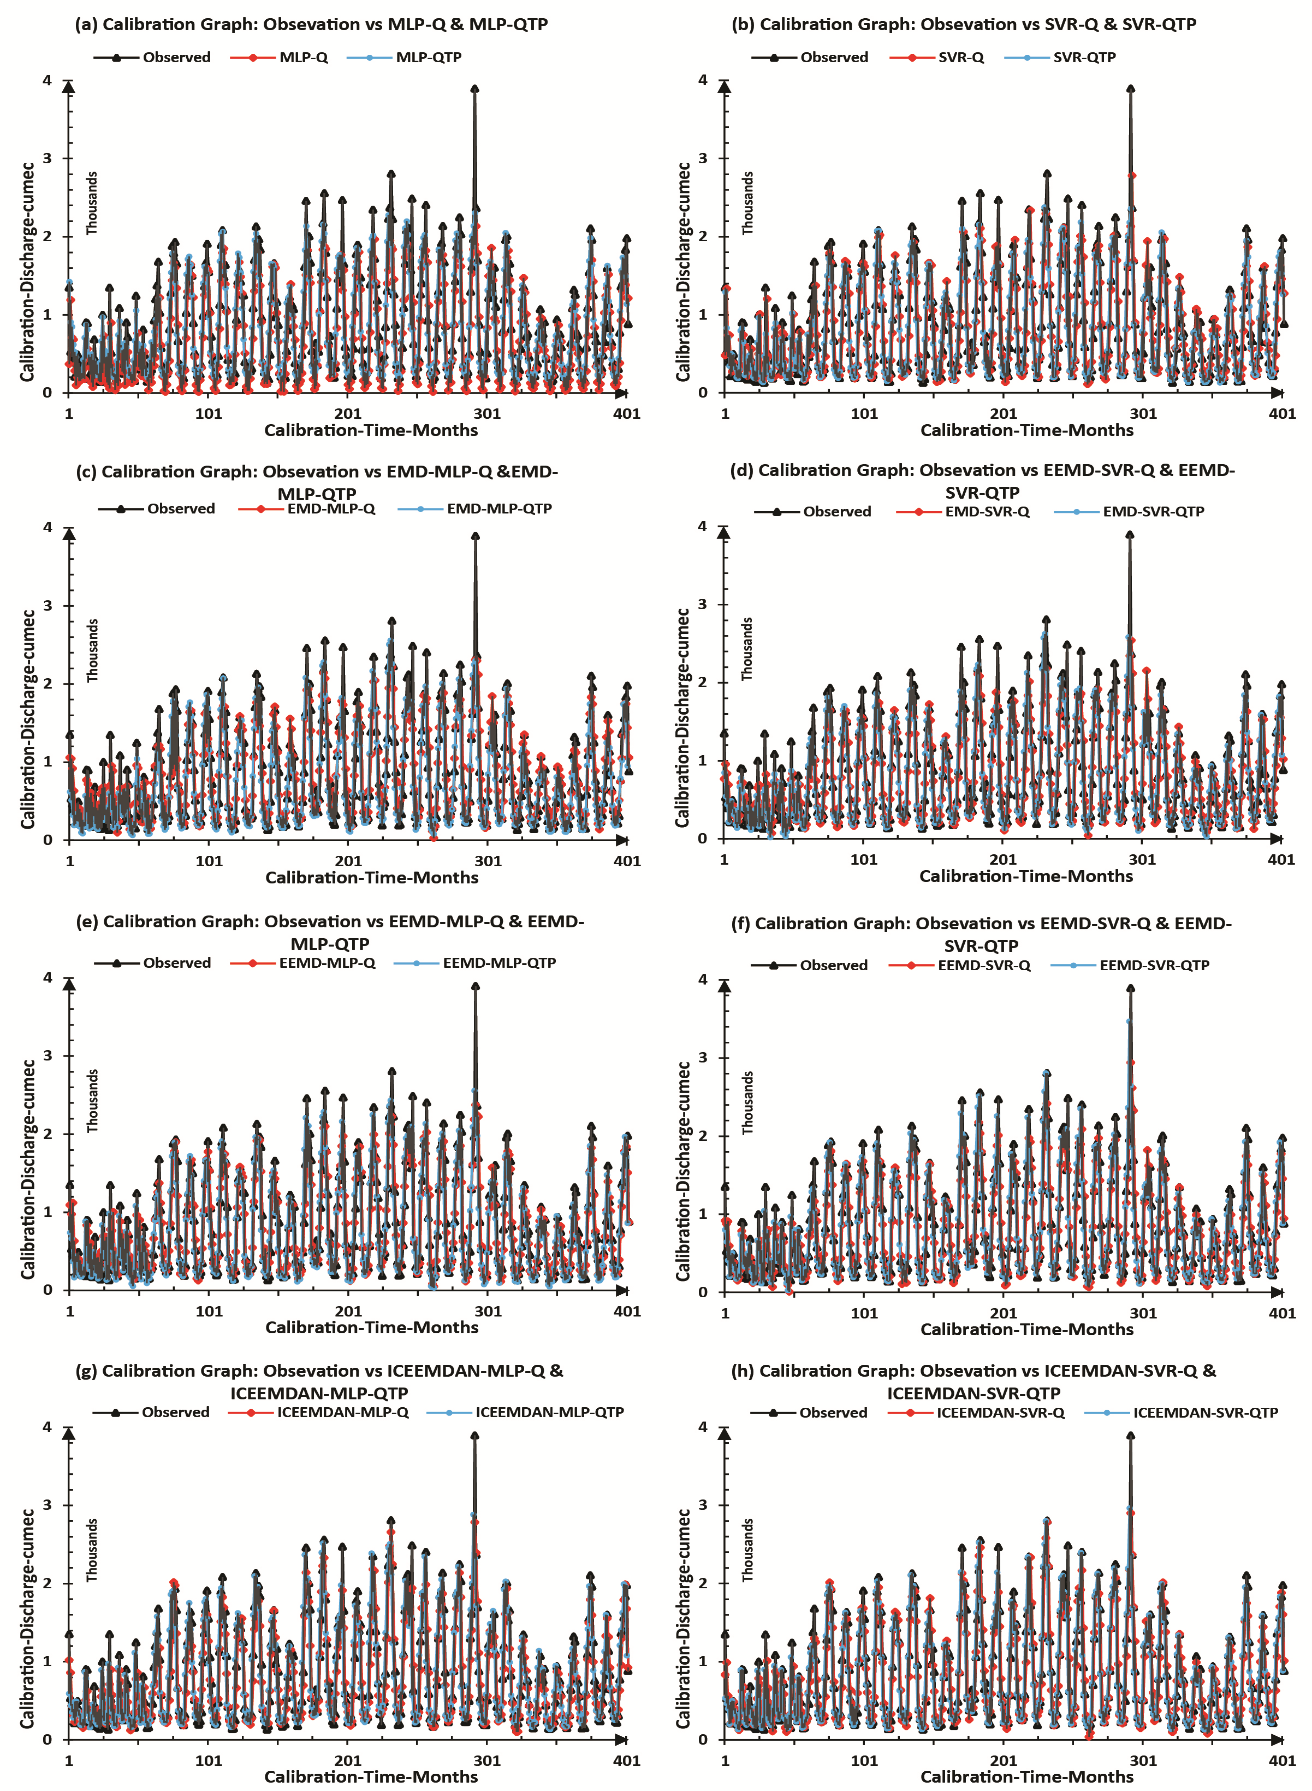


Figure 6. FHGs for observed vs all developed RMs and RRMs models during calibration phase


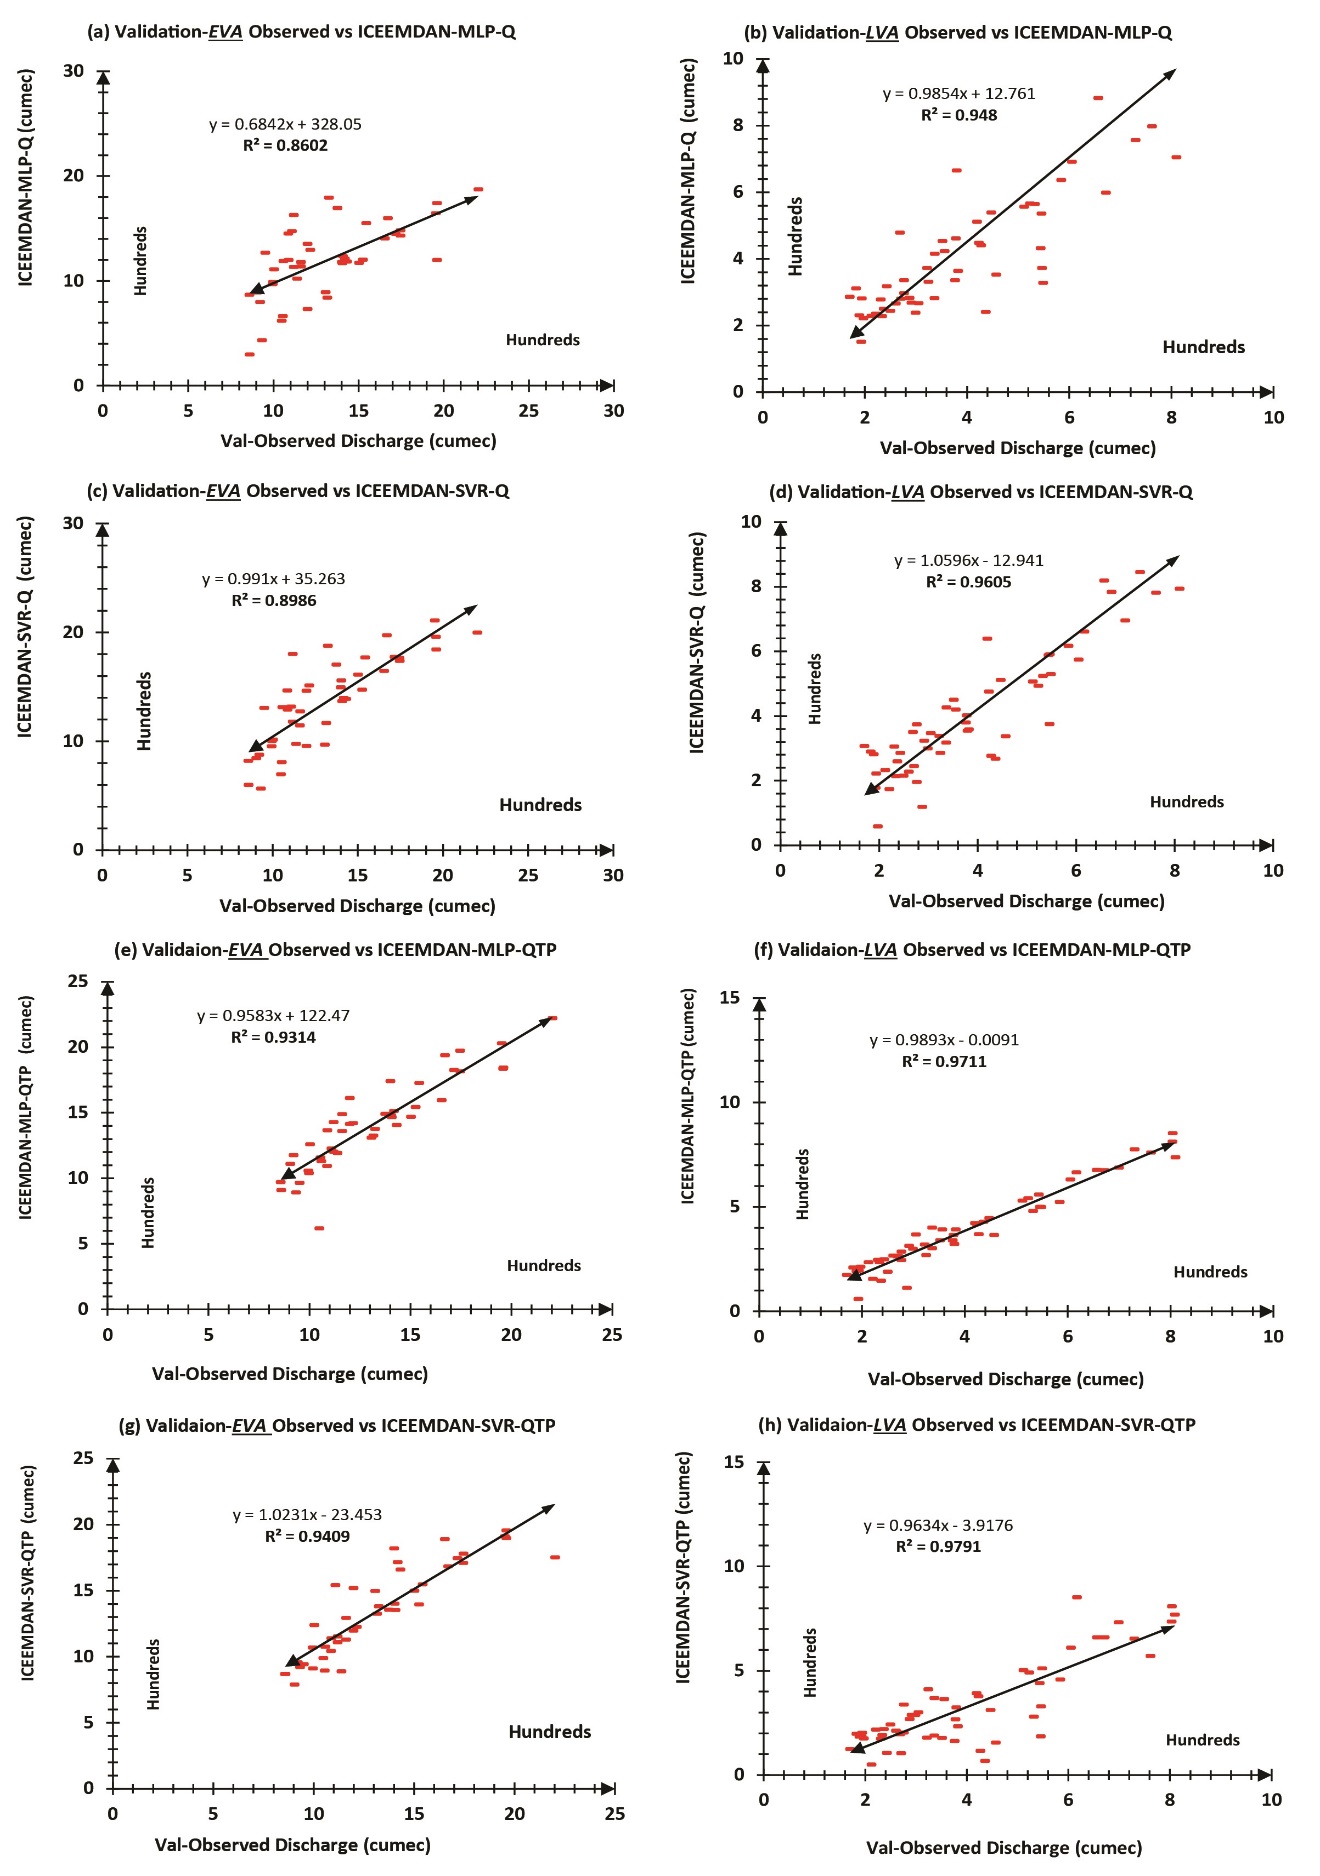


Figure 7. EVA and LVA for all ICEEMDAN based models

**Supplementary List of Tables:**

Table: 1 Climatic station with their corresponding statistical details, Mangla watershed

Table 2. Developed runoff models (RMs), single Input variable (SIV) and their corresponding inputs

Table 3. Developed rainfall runoff models (RRMs), multiple Input variables (MIV) and their corresponding inputs

Table 4. Inter-comparison of PEC as well as EVA and LVA for optimum SVR-QTP based models

Table: 1 Climatic station with their corresponding statistical details, Mangla watershed

| **No.** | **Station** | **Duration**  **(Years)** | **Lat.**  **(dd)** | **Lon.**  **(dd)** | **Precipitation** | | | | | **Temperature** | | | | |
| --- | --- | --- | --- | --- | --- | --- | --- | --- | --- | --- | --- | --- | --- | --- |
| **Mean**  **(mm)** | **SD** | **Cv** | **Cs** | **Ck** | **Mean**  **(C˚)** | **SD** | **Cv** | **Cs** | **Ck** |
| **1** | **Balakot** | 1971-2013 | 34.6 | 73.4 | 1493 | 90.3 | -23.7 | -10.6 | 114 | 18.6 | 7.48 | 0.40 | -0.11 | -1.18 |
| **2** | **Gharidopatta** | 1971-2013 | 34.2 | 73.6 | 1291 | 89.6 | -21.9 | -10.7 | 116.4 | 16.8 | 49.9 | 2.95 | -19.8 | 399 |
| **3** | **Kotli** | 1971-2013 | 33.5 | 73.9 | 1142 | 10.6 | 3.33 | 6.22 | 57.21 | 21.9 | 7.26 | 0.33 | -0.21 | -1.1 |
| **4** | **Murree** | 1971-2013 | 34.4 | 73.5 | 1314 | 11.9 | 2.9 | 6.18 | 63.9 | 13.0 | 6.62 | 0.50 | -0.41 | -0.82 |
| **5** | **Muzaffarabad** | 1971-2013 | 34.0 | 73.8 | 1145 | 292 | -3.24 | -2.77 | 5.71 | 20.6 | 7.70 | 0.37 | -0.20 | -1.19 |
| **6** | **Bagh** | 1971-2013 | 33.3 | 73.3 | 1243 | 9.37 | 2.78 | 5.15 | 44.3 | 17.9 | 7.77 | 0.43 | -0.38 | -0.65 |
| **7** | **Gujar Khan** | 1971-2013 | 34.0 | 74.0 | 850 | 7.29 | 3.85 | 6.82 | 65.2 | 18.0 | 43.6 | 2.42 | -11.2 | 129 |
| **8** | **Kallar** | 1971-2013 | 33.4 | 73.4 | 923 | 7.12 | 3.89 | 5.82 | 37.3 | 23.0 | 8.0 | 0.34 | 4.3 | 162 |
| **9** | **Mangla** | 1971-2013 | 31.1 | 73.6 | 877 | 8.47 | 3.96 | 6.77 | 61.0 | 15.9 | 37.1 | 2.32 | -12.7 | 171 |
| **10** | **Naran** | 1971-2013 | 34.9 | 73.7 | 1695 | 418 | -1.90 | -1.32 | -0.25 | 12.1 | 9.37 | 0.77 | -0.13 | -0.79 |
| **11** | **Plandri** | 1971-2013 | 34.2 | 73.6 | 1390 | 120 | 59.7 | 62.0 | 38.5 | 17.5 | 6.87 | 0.414 | -0.30 | -0.87 |
| **12** | **Rawalakot** | 1971-2013 | 33.9 | 73.4 | 1369 | 9.03 | 3.35 | 8.18 | 101 | 14.8 | 8.00 | 0.45 | 0.04 | -0.45 |

Table 2. Developed runoff models (RMs), single Input variable (SIV) and their corresponding inputs

|  | **Runoff Models (RMs)** | | |
| --- | --- | --- | --- |
| **S.no** | **Model** | **SIV** | **Selected Inputs for each model** |
| **01** | MLP-Q | streamflow (Q) | (Qt-1, Qt-2, Qt-3, Qt-6, Qt-7, Qt-10, Qt-11, Qt-12 + Q-Observation) |
| **02** | SVR-Q | streamflow (Q) | (Qt-1, Qt-2, Qt-3, Qt-6, Qt-7, Qt-10, Qt-11, Qt-12 + Q-Observation) |
| **03** | EMD-MLP-Q | streamflow (Q) | Qt-1(IMF1–IMF7, r), Qt-2(IMF1–IMF7, r), Qt-3(IMF1–IMF7, r), Qt-6(IMF1–IMF7, r), Qt-7(IMF1–IMF7, r), Qt-10(IMF1–IMF7, r), Qt-11(IMF1–IMF7, r), Qt-12(IMF1–IMF7, r) + Q-Observation |
| **04** | EMD-SVR-Q | streamflow (Q) | Qt-1(IMF1–IMF7, r), Qt-2(IMF1–IMF7, r), Qt-3(IMF1–IMF7, r), Qt-6(IMF1–IMF7, r), Qt-7(IMF1–IMF7, r), Qt-10(IMF1–IMF7, r), Qt-11(IMF1–IMF7, r), Qt-12(IMF1–IMF7, r) + Q-Observation |
| **05** | EEMD-MLP-Q | streamflow (Q) | Qt-1(IMF1–IMF9, r), Qt-2(IMF1–IMF9, r), Qt-3(IMF1–IMF9, r), Qt-6(IMF1–IMF9, r), Qt-7(IMF1–IMF9, r), Qt-10(IMF1–IMF9, r), Qt-11(IMF1–IMF9, r), Qt-12(IMF1–IMF, r) + Q-Observation |
| **06** | EEMD-SVR-Q | streamflow (Q) | Qt-1(IMF1–IMF9, r), Qt-2(IMF1–IMF9, r), Qt-3(IMF1–IMF9, r), Qt-6(IMF1–IMF9, r), Qt-7(IMF1–IMF9, r), Qt-10(IMF1–IMF9, r), Qt-11(IMF1–IMF9, r), Qt-12(IMF1–IMF9, r) + Q-Observation |
| **07** | ICEEMDAN-MLP-Q | streamflow (Q) | Qt-1(IMF1–IMF8, r), Qt-2(IMF1–IMF8, r), Qt-3(IMF1–IMF8, r), Qt-6(IMF1–IMF8, r), Qt-7(IMF1–IMF8, r), Qt-10(IMF1–IMF8, r), Qt-11(IMF1–IMF8, r), Qt-12(IMF1–IMF8, r) + Q-Observation |
| **08** | ICEEMDAN-SVR-Q | streamflow (Q) | Qt-1(IMF1–IMF8, r), Qt-2(IMF1–IMF8, r), Qt-3(IMF1–IMF8, r), Qt-6(IMF1–IMF8, r), Qt-7(IMF1–IMF8, r), Qt-10(IMF1–IMF8, r), Qt-11(IMF1–IMF8, r), Qt-12(IMF1–IMF8, r) + Q-Observation |

Table 3. Developed rainfall runoff models (RRMs), multiple Input variables (MIV) and their corresponding inputs

|  | **Rainfall Runoff Models (RRMs)** | | |
| --- | --- | --- | --- |
| **no** | **Model** | **MIV** | **Selected Inputs for each model** |
| **01** | MLP-QTP | streamflow (Q)  Temperature (T)  Precipitation (P) | Qt-1, Qt-2, Qt-3, Qt-6, Qt-7, Qt-10, Qt-11, Qt-12,Tt-1, Tt-2, Tt-3, Tt-4, Tt-8, Tt-9, Tt-10, Tt-11, Tt-12, Pt-1, Pt-9, Pt-11, Pt-12+ (Q-T-P-Observation) |
| **02** | SVR-QTP | streamflow (Q)  Temperature (T)  Precipitation (P) | Qt-1, Qt-2, Qt-3, Qt-6, Qt-7, Qt-10, Qt-11, Qt-12,Tt-1, Tt-2, Tt-3, Tt-4, Tt-8, Tt-9, Tt-10, Tt-11, Tt-12, Pt-1, Pt-9, Pt-11, Pt-12+(Q-T-P-Observation) |
| **03** | EMD-MLP-QTP | streamflow (Q)  Temperature (T)  Precipitation (P) | Qt-1(IMF1–IMF7, r), Qt-2(IMF1–IMF7, r), Qt-3(IMF1–IMF7, r), Qt-6(IMF1–IMF7, r), Qt-7(IMF1–IMF7, r), Qt-10(IMF1–IMF7, r), Qt-11(IMF1–IMF7, r), Qt-12(IMF1–IMF7, r), Tt-1(IMF1–IMF7, r), Tt-2(IMF1–IMF7, r), Tt-3(IMF1–IMF7, r), Tt-4(IMF1–IMF7, r), Tt-8(IMF1–IMF7, r), Tt-9(IMF1–IMF7, r), Tt-10(IMF1–IMF7, r), Tt-11(IMF1–IMF7, r), Tt-12(IMF1–IMF7, r), Pt-1(IMF1–IMF7, r), Pt-9(IMF1–IMF7, r), Pt-11(IMF1–IMF7, r), Pt-12(IMF1–IMF7, r) +(Q-T-P-Observation) |
| **04** | EMD-SVR-QTP | Discharge (Q)  Temperature (T)  Precipitation (P) | Qt-1(IMF1–IMF7, r), Qt-2(IMF1–IMF7, r), Qt-3(IMF1–IMF7, r), Qt-6(IMF1–IMF7, r), Qt-7(IMF1–IMF7, r), Qt-10(IMF1–IMF7, r), Qt-11(IMF1–IMF7, r), Qt-12(IMF1–IMF7, r), Tt-1(IMF1–IMF7, r), Tt-2(IMF1–IMF7, r), Tt-3(IMF1–IMF7, r), Tt-4(IMF1–IMF7, r), Tt-8(IMF1–IMF7, r), Tt-9(IMF1–IMF7, r), Tt-10(IMF1–IMF7, r), Tt-11(IMF1–IMF7, r), Tt-12(IMF1–IMF7, r), Pt-1(IMF1–IMF7, r), Pt-9(IMF1–IMF7, r), Pt-11(IMF1–IMF7, r), Pt-12(IMF1–IMF7, r) +(Q-T-P-Observation) |
| **05** | EEMD-MLP-QTP | Discharge (Q)  Temperature (T)  Precipitation (P) | Qt-1(IMF1–IMF9, r), Qt-2(IMF1–IMF9, r), Qt-3(IMF1–IMF9, r), Qt-6(IMF1–IMF9, r), Qt-7(IMF1–IMF9, r), Qt-10(IMF1–IMF9, r), Qt-11(IMF1–IMF9, r), Qt-12(IMF1–IMF9, r), Tt-1(IMF1–IMF9, r), Tt-2(IMF1–IMF9, r), Tt-3(IMF1–IMF9, r), Tt-4(IMF1–IMF9, r), Tt-8(IMF1–IMF9, r), Tt-9(IMF1–IMF9, r), Tt-10(IMF1–IMF9, r), Tt-11(IMF1–IMF9, r), Tt-12(IMF1–IMF9, r), Pt-1(IMF1–IMF9, r), Pt-9(IMF1–IMF9, r), Pt-11(IMF1–IMF9, r), Pt-12(IMF1–IMF9, r) +(Q-T-P-Observation) |
| **06** | EEMD-SVR-QTP | Discharge (Q)  Temperature (T)  Precipitation (P) | Qt-1(IMF1–IMF9, r), Qt-2(IMF1–IMF9, r), Qt-3(IMF1–IMF9, r), Qt-6(IMF1–IMF9, r), Qt-7(IMF1–IMF9, r), Qt-10(IMF1–IMF9, r), Qt-11(IMF1–IMF9, r), Qt-12(IMF1–IMF9, r), Tt-1(IMF1–IMF9, r), Tt-2(IMF1–IMF9, r), Tt-3(IMF1–IMF9, r), Tt-4(IMF1–IMF9, r), Tt-8(IMF1–IMF9, r), Tt-9(IMF1–IMF9, r), Tt-10(IMF1–IMF9, r), Tt-11(IMF1–IMF9, r), Tt-12(IMF1–IMF9, r), Pt-1(IMF1–IMF9, r), Pt-9(IMF1–IMF9, r), Pt-11(IMF1–IMF9, r), Pt-12(IMF1–IMF9, r) +(Q-T-P-Observation) |
| **07** | ICEEMDAN-MLP-QTP | Discharge (Q)  Temperature (T)  Precipitation (P) | Qt-1(IMF1–IMF8, r), Qt-2(IMF1–IMF8, r), Qt-3(IMF1–IMF8, r), Qt-6(IMF1–IMF8, r), Qt-7(IMF1–IMF8, r), Qt-10(IMF1–IMF8, r), Qt-11(IMF1–IMF8, r), Qt-12(IMF1–IMF8, r), Tt-1(IMF1–IMF8, r), Tt-2(IMF1–IMF8, r), Tt-3(IMF1–IMF8, r), Tt-4(IMF1–IMF, r), Tt-8(IMF1–IMF8, r), Tt-9(IMF1–IMF8, r), Tt-10(IMF1–IMF8, r), Tt-11(IMF1–IMF8, r), Tt-12(IMF1–IMF8, r), Pt-1(IMF1–IMF8, r), Pt-9(IMF1–IMF8, r), Pt-11(IMF1–IMF8, r), Pt-12(IMF1–IMF8, r) +(Q-T-P-Observation) |
| **08** | ICEEMDAN-SVR-QTP | Discharge (Q)  Temperature (T)  Precipitation (P) | Qt-1(IMF1–IMF8, r), Qt-2(IMF1–IMF8, r), Qt-3(IMF1–IMF8, r), Qt-6(IMF1–IMF8, r), Qt-7(IMF1–IMF8, r), Qt-10(IMF1–IMF8, r), Qt-11(IMF1–IMF8, r), Qt-12(IMF1–IMF8, r), Tt-1(IMF1–IMF8, r), Tt-2(IMF1–IMF8, r), Tt-3(IMF1–IMF8, r), Tt-4(IMF1–IMF, r), Tt-8(IMF1–IMF8, r), Tt-9(IMF1–IMF8, r), Tt-10(IMF1–IMF8, r), Tt-11(IMF1–IMF8, r), Tt-12(IMF1–IMF8, r), Pt-1(IMF1–IMF8, r), Pt-9(IMF1–IMF8, r), Pt-11(IMF1–IMF8, r), Pt-12(IMF1–IMF8, r) +(Q-T-P-Observation) |

Table 4. Inter-comparison of PEC as well as EVA and LVA for optimum SVR-QTP based models

| **S.no** | **Model** | **Variable** | **MAE** | **RMSE** | **R2** | **MAPE** | **NSCE** | **EVA-CP/VP**  **AP%** | **LVA**  **CP/VP AP%** |
| --- | --- | --- | --- | --- | --- | --- | --- | --- | --- |
| 01 | SVR | QTP | 120.43 | 200.81 | 0.87 | 17.21 | 0.85 | 83/84 | 92/93 |
| 02 | EMD-SVR | QTP | 120.04 | 176.53 | 0.91 | 18.4 | 0.88 | 85/87 | 94/96 |
| 03 | EEMD-SVR | QTP | 77.03 | 107.94 | 0.96 | 12.5 | 0.96 | 86/90 | 95/96 |
| 04 | ICEEMD-SVR | QTP | 59.56 | 91.82 | 0.97 | 8.75 | 0.97 | 88/94 | 97/97 |
